# Supplementary material for: Development of Ferromagnetic Materials Containing Co2P, Fe2P Phases from Organometallic Dendrimers Precursors
Source: MDPI journal article supplement (doi:10.3390/molecules26216732), 2021-11-06
Supplement: s1 [file s1]

# Development of Ferromagnetic Materials Containing Co<sub>2</sub>P, Fe<sub>2</sub>P

## Phases from Organometallic Dendrimers Precursors

Alaa S. Abd-El-Aziz<sup>\*,a</sup>, Maysun R. Benaisha<sup>a</sup>, Mohammed S. M. Abdelbaky<sup>b</sup>,  
David Martinez –Blanco<sup>c</sup>, Santiago García-Granda<sup>b</sup>, Amani A. Abdelghani<sup>a</sup>,  
Laila H. Abdel-Rahman<sup>d</sup>, Rabin Bissessur<sup>a</sup>,

a. *Department of Chemistry, University of Prince Edward Island, 550 University Avenue, Charlottetown, PE, C1A 4P3, Canada.*

b. *Department of Physical and Analytical Chemistry, University of Oviedo-CINN, 33006 Oviedo, Spain.*

c. *Scientific and Technical Services, University of Oviedo-CINN, 33006 Oviedo, Spain.*

d. *Chemistry Department, Faculty of Science, Sohag University, 82524 Sohag, Egypt*

*\*Corresponding Author E-mail: abdelaziz@upeu.ca*

## Electronic Supporting Information

**Table S1:** Refined lattice parameters for crystalline phases identified on XRD patterns of magnetic homometallic samples.

| Chemical Name             | Formula                                          | Space Group                        | <i>a</i> (Å)<br><i>α</i> (°) | <i>b</i> (Å)<br><i>β</i> (°) | <i>c</i> (Å)<br><i>γ</i> (°) | Reference |
|---------------------------|--------------------------------------------------|------------------------------------|------------------------------|------------------------------|------------------------------|-----------|
| ε-Iron Phosphide (3/1)    | Fe <sub>3</sub> P                                | <i>I</i> -4                        | 9.106(8)<br>90               | 9.106(8)<br>90               | 4.460(4)<br>90               | [59]      |
| Iron Phosphide (2/1)      | Fe <sub>2</sub> P                                | <i>P</i> -6 2 <i>m</i>             | 5.866(5)<br>90               | 5.866(5)<br>90               | 3.457(3)<br>120              | [60]      |
| Iron(III) Phosphide       | FeP                                              | <i>P n m a</i>                     | 5.191(4)<br>90               | 3.098(3)<br>90               | 5.790(5)<br>90               | [61]      |
| Iron BCC                  | Fe                                               | <i>I m</i> -3 <i>m</i>             | 2.866(2)<br>90               | 2.866(2)<br>90               | 2.866(2)<br>90               | -         |
| Triiron Bis(phosphate(V)) | Fe <sub>3</sub> (PO <sub>4</sub> ) <sub>2</sub>  | <i>P</i> 2 <sub>1</sub> / <i>c</i> | 8.714(16)<br>90              | 11.175(19)<br>99.71(13)      | 6.248(12)<br>90              | [62]      |
| Diiron Diphosphate(V)     | Fe <sub>2</sub> (P <sub>2</sub> O <sub>7</sub> ) | <i>P</i> 1                         | 4.477(4)<br>103.52(5)        | 5.285(5)<br>98.32(4)         | 5.490(5)<br>98.37(4)         | [63]      |

**Table S2.** Refined lattice parameters for crystalline phases identified on XRD patterns of magnetic heterometallic samples.

| Chemical Name                 | Formula           | Space Group   | $a$ (Å)<br>$\alpha$ (°) | $b$ (Å)<br>$\beta$ (°) | $c$ (Å)<br>$\gamma$ (°) | Reference |
|-------------------------------|-------------------|---------------|-------------------------|------------------------|-------------------------|-----------|
| Cobalt Phosphide (2/1)        | Co <sub>2</sub> P | $P n m a$     | 5.6815(3)<br>90         | 3.5193(2)<br>90        | 6.6086(4)<br>90         | [64]      |
| Iron FCC                      | Fe                | $F m -3 m$    | 3.5685(1)<br>90         | 3.5685(1)<br>90        | 3.5685(1)<br>90         | -         |
| Cobalt FCC                    | Co                | $F m -3 m$    | 3.55715(8)<br>90        | 3.55715(8)<br>90       | 3.55715(8)<br>90        | -         |
| Cobalt HCP                    | Co                | $P 6_3/m m c$ | 2.470(3)<br>90          | 2.470(3)<br>90         | 4.035(11)<br>120        | -         |
| Iron BCC                      | Fe                | $I m -3 m$    | 2.8440(1)<br>90         | 2.8440(1)<br>90        | 2.8440(1)<br>90         | -         |
| Cobalt Phosphide (2/1) - Beta | Co <sub>2</sub> P | $P -6 2 m$    | 5.7867(2)<br>90         | 5.7867(2)<br>90        | 3.4369(2)<br>120        | [65]      |

**Table S3:** Show Crystal size in Å and Crystallinity of magnetic homometallic samples

|                | Fe <sub>3</sub> P | Fe <sub>2</sub> P | FeP | Fe  | Fe <sub>3</sub> (PO <sub>4</sub> ) <sub>2</sub> | Fe <sub>2</sub> (P <sub>2</sub> O <sub>7</sub> ) | Crystallinilt |
|----------------|-------------------|-------------------|-----|-----|-------------------------------------------------|--------------------------------------------------|---------------|
| <b>HOMO_G1</b> | 805               | 735               |     | 415 | 56                                              | 132                                              | 72.54%        |
| <b>HOMO_G2</b> | 367               | 370               | 513 | 319 | 67                                              | 132                                              | 65.54%        |
| <b>HOMO_G3</b> | -                 | 857               | 885 | -   | -                                               | 187                                              | 76.15%        |
| <b>HOMO_G4</b> | -                 | 518               | 621 | -   | -                                               | 129                                              | 80.10%        |

**Table S4.** Show Crystal size in Å and Crystallinity of magnetic heterometallic samples.

|                  | Co <sub>2</sub> | Fe- | Co- | Co- | Fe- | Co <sub>2</sub> P- | Crystallinilt |
|------------------|-----------------|-----|-----|-----|-----|--------------------|---------------|
|                  | P               | FCC | FCC | HCP | BCC | $\beta$            | y             |
| <b>HETERO_G1</b> | 376             | 417 | 417 | -   | 220 | 254                | 75.92%        |
| <b>HETERO_G2</b> | 467             | 417 | 417 | -   | 330 | 628                | 76.51%        |
| <b>HETERO_G3</b> | 367             | 273 | 713 | 232 | 256 | -                  | 75.30%        |
| <b>HETERO_G4</b> | 536             | 345 | 598 | 232 | 437 | -                  | 86.23%        |

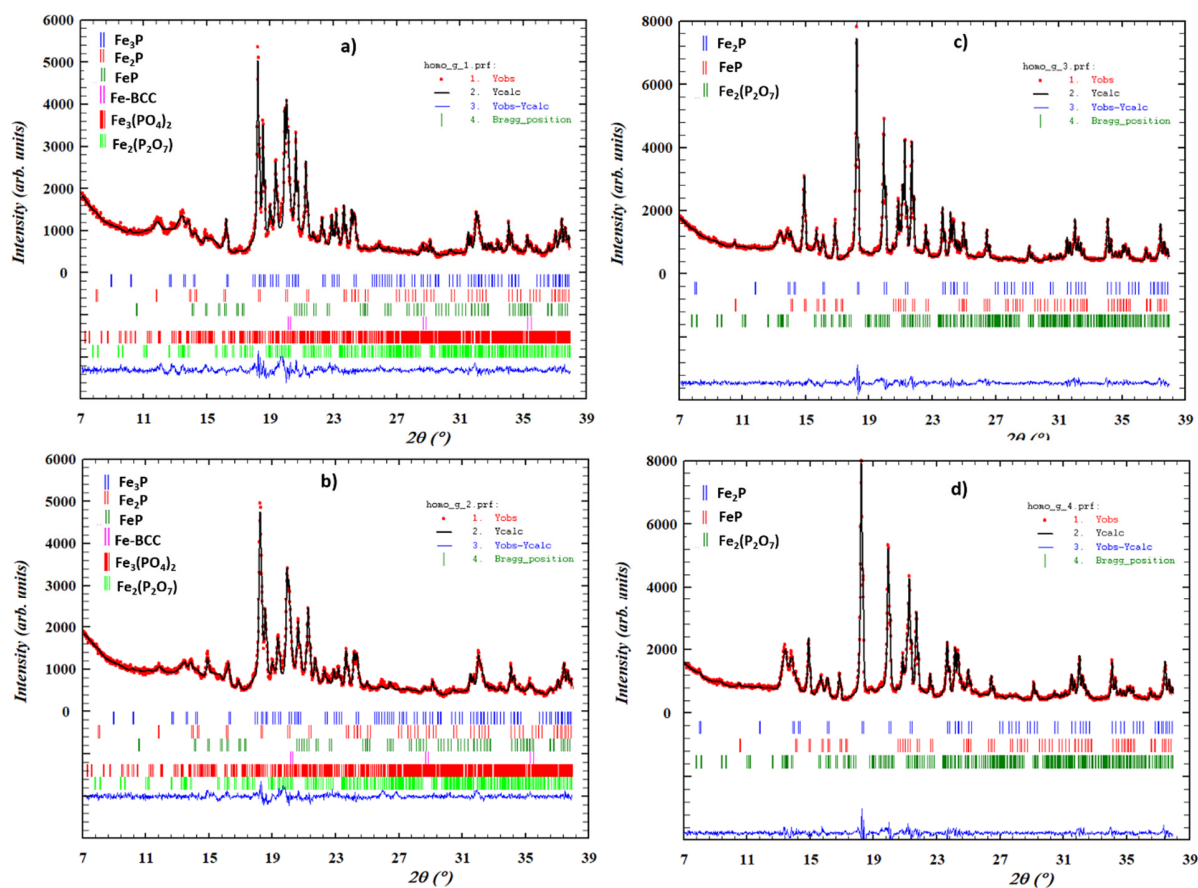

**Figure S1.** Whole pattern profile fit for the X-ray diffraction pattern of : a) HOMO-G1, b) HOMO-G2, c) HOMO-G3 and d) HOMO-G4 by means Rietveld method: observed (red points) and calculated (black line). Positions of the Bragg reflections are depicted by green vertical bars (arranged in rows for each phase) and the observed-calculated difference is showed by blue line at the bottom.

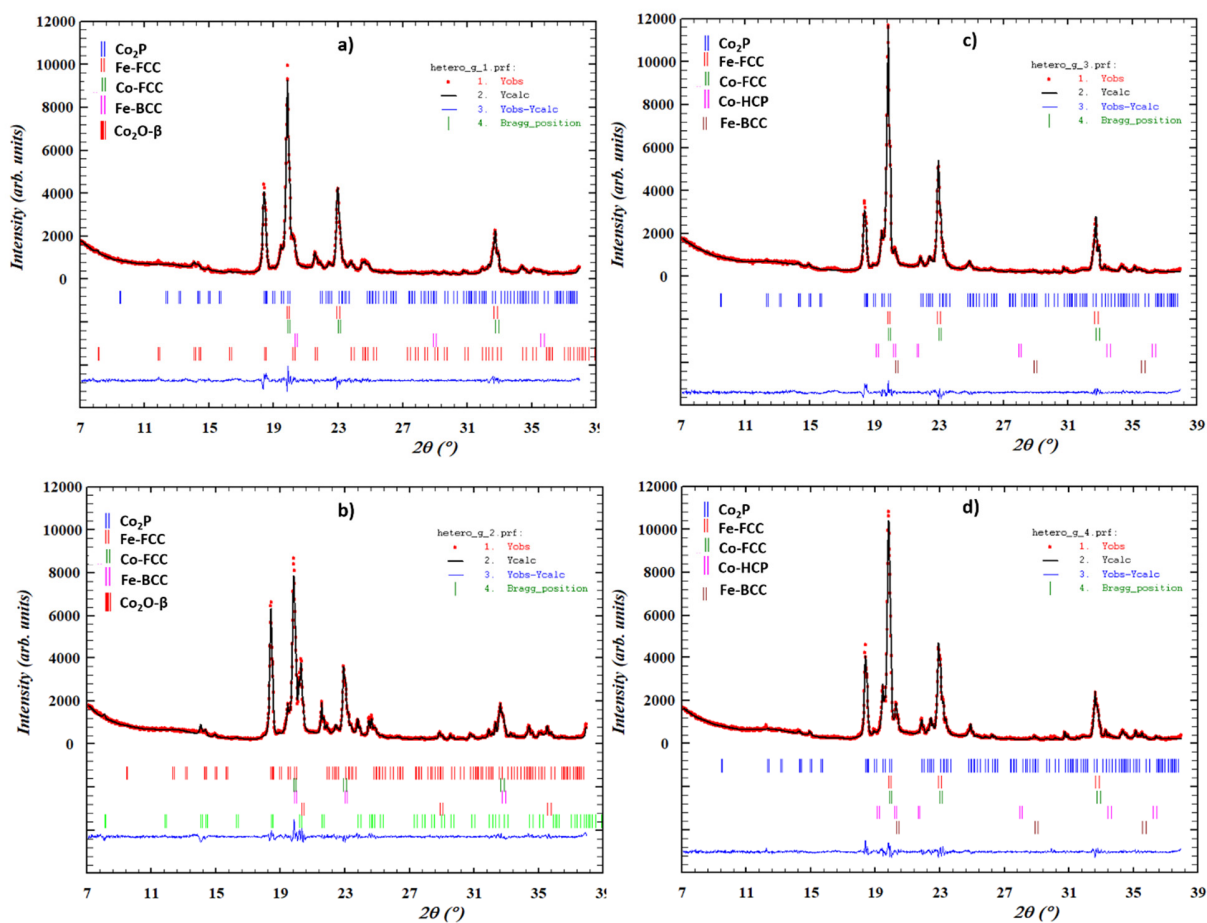

**Figure S2.** Whole pattern profile fit for the X-ray diffraction pattern of a) HETERO-G1, b) HETERO-G2, c) HETERO-G3 and d) HETERO-G4 by means Rietveld method: observed (red points) and calculated (black line). Positions of the Bragg reflections are depicted by green vertical bars (arranged in rows for each phase) and the observed-calculated difference is showed by blue line at the bottom.
